# Supplementary material for: Preparation, characterization, and catalytic performances of a pyrazine dicarboxylate-bridging rare-earth-containing polytungstoarsenate aggregate for selective oxidation of thiophenes and deep desulfurization of model fuels
Source: Royal Society of Chemistry journal article supplement (doi:10.1039/c8dt01243a), 2018-01-01
Supplement: c8dt01243a1.pdf [file c8dt01243a1.pdf]

## Supporting Information

### **Preparation, characterization, and catalytic performances of a pyrazine dicarboxylate-bridging rare-earth-containing polytungstoarsenate aggregate for selective oxidation of thiophenes and deep desulfurization of model fuels**

Yanjun Niu, Qiaofei Xu, Yuan Wang, Zhao Li, Jingkun Lu, Pengtao Ma, Chao Zhang, Jingyang Niu\*  
and Jingping Wang\*

*Henan Key Laboratory of Polyoxometalate Chemistry, Institute of Molecular and Crystal Engineering,  
College of Chemistry and Chemical Engineering, Henan University, Kaifeng 475004, Henan, China*

E-mail:

Fax: (+86)371-23886876.

### CONTENTS

**Section 1** Additional Structural Figure

**Section 2** Experimental Section

**Section 3** Catalytic properties

**Section 4** References

## Section 1 Additional Structural Figure

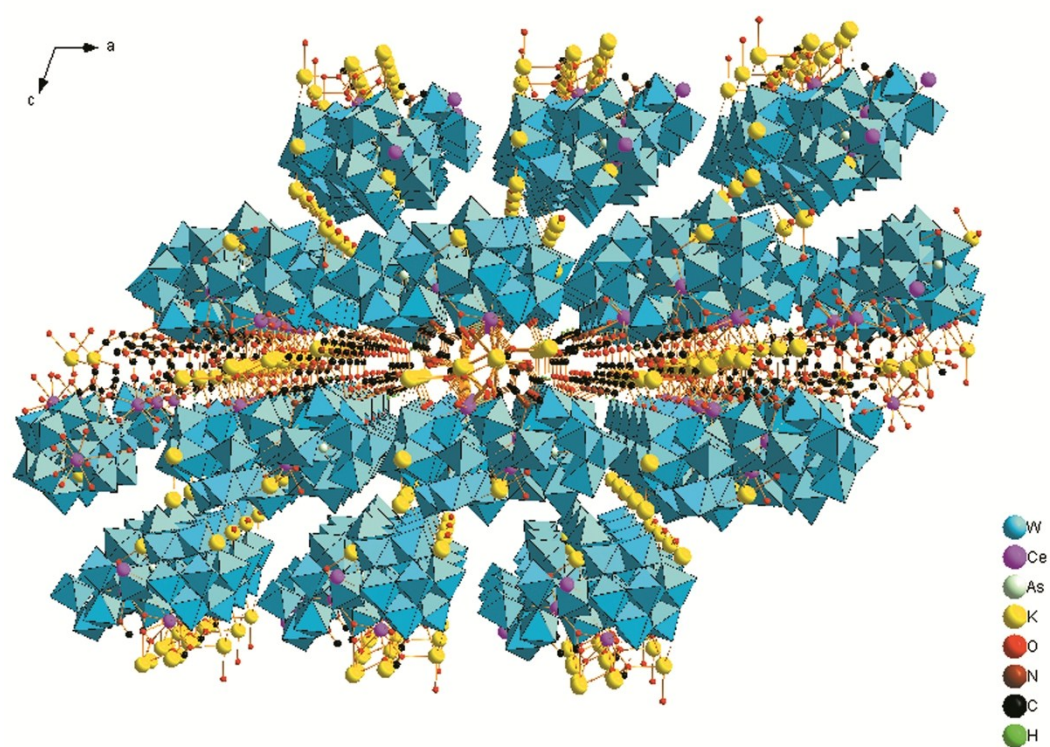

**Figure S1.** The 3D structure of **1**

## Section 2 Experimental Section

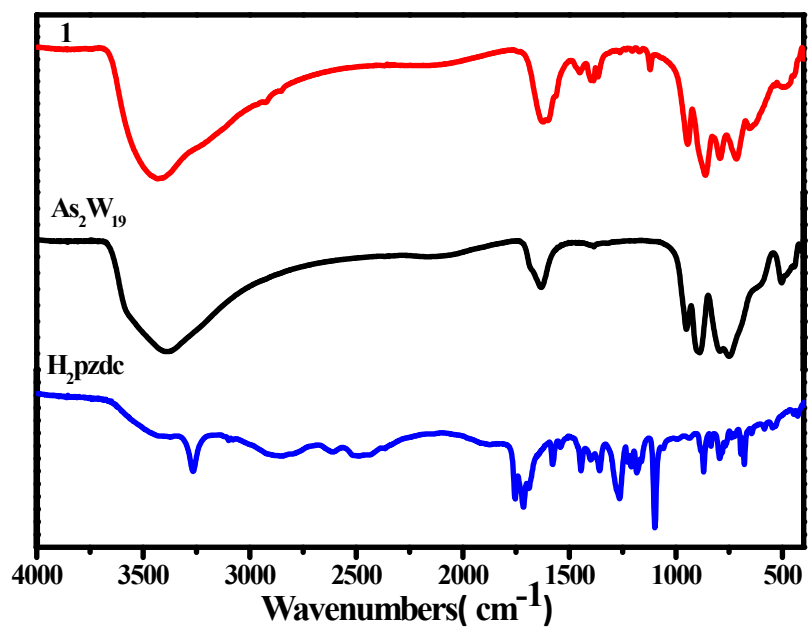

**Figure S2.** The IR spectra of the precursor free H<sub>2</sub>pzdc ligand, {As<sub>2</sub>W<sub>19</sub>}, and **1**

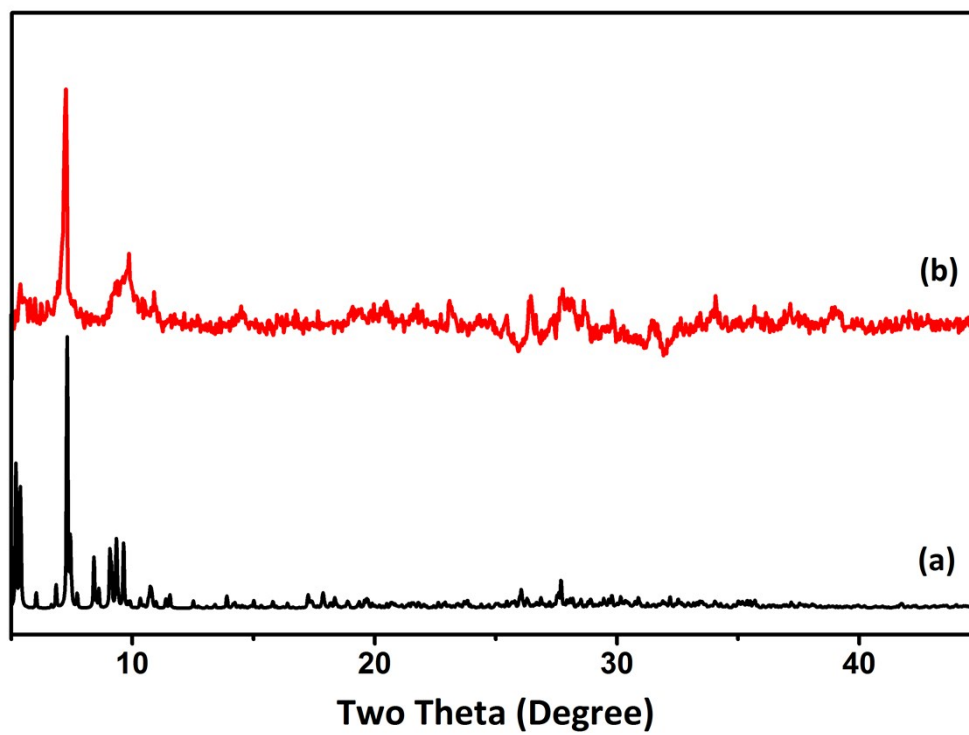

**Figure S3.** The experimental (a) and simulated (b) PXRD pattern of **1**

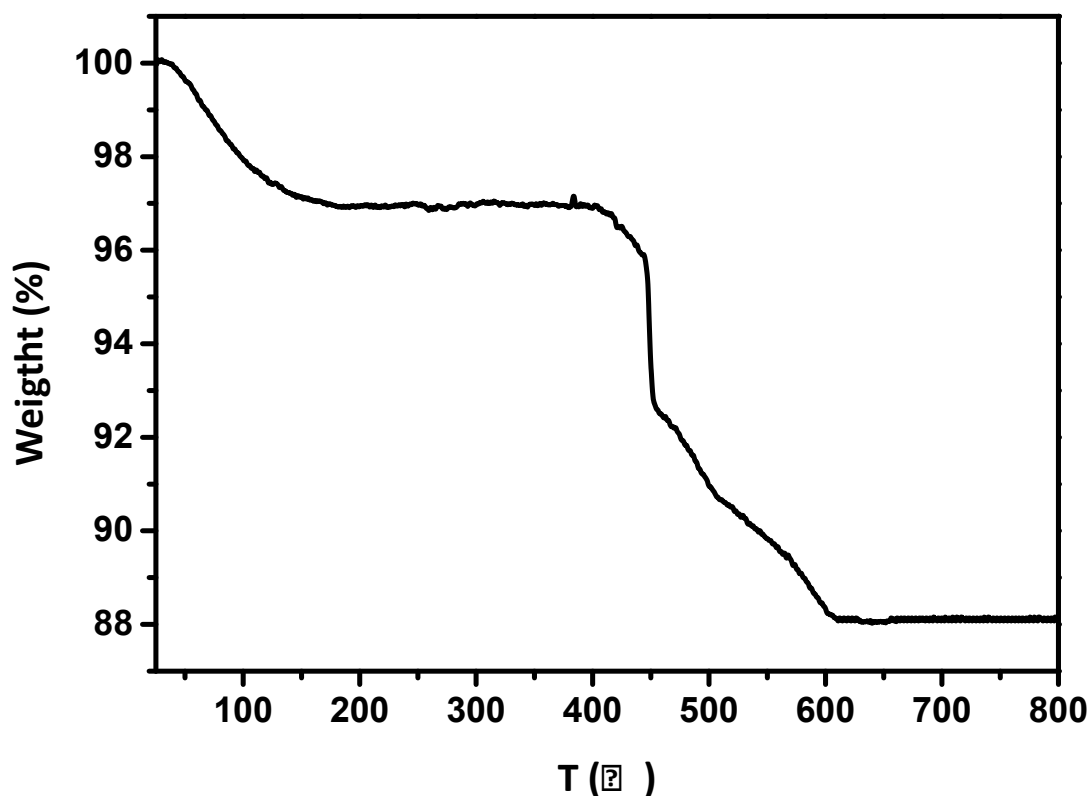

**Figure S4.** TG curve of **1** in a N<sub>2</sub> atmosphere in the range of 25–800 °C.

The TGA curve (Figure S4) shows two steps of weight loss at the range of 25–800 °C. The first weight loss is 3.10 % (calcd 7.2 %) from 25 to 400 °C, assigned to the release of 22 lattice water molecules and 14 coordinated water molecules. The second weight loss is 8.60 % (calcd 8.2 %) at the range of 600–800 °C, which can be ascribed to the removal of 2 ligands, 3 constitutional water molecules and 1.5 As<sub>2</sub>O<sub>3</sub> molecules. The first weight loss is more than the theoretical value because the samples used for thermogravimetric analyses were easy to weathering.

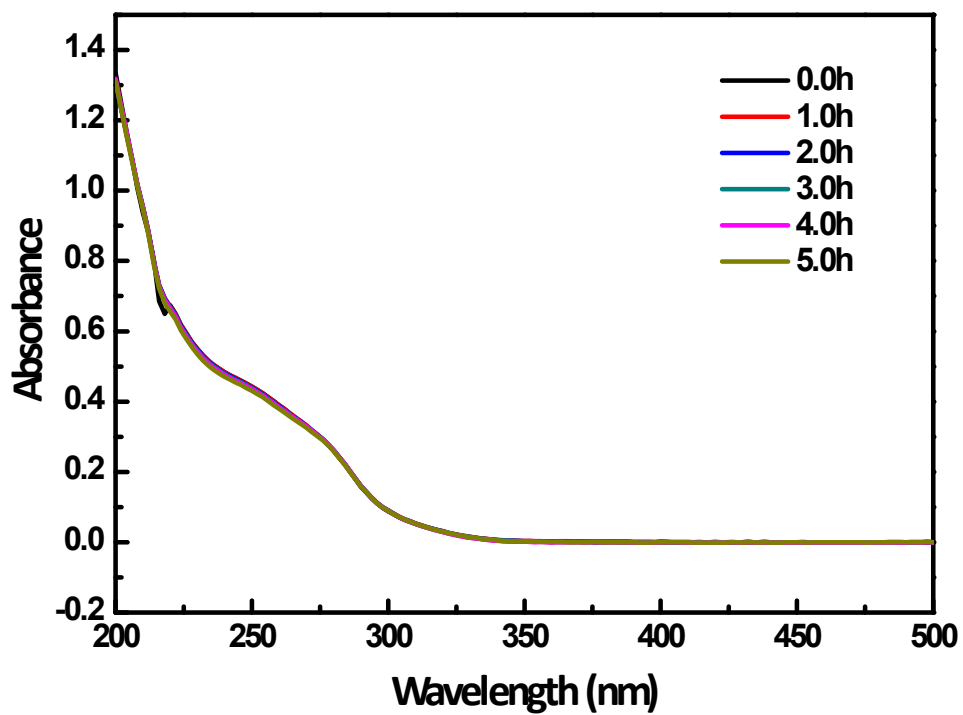

Figure S5. The UV-vis spectra of **1**

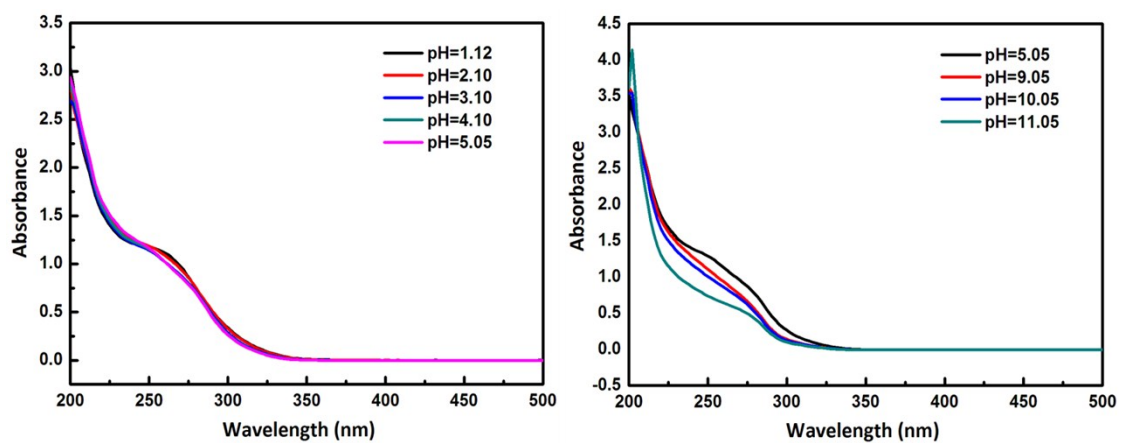

Figure S6. The UV-vis spectra of **1** at different pH values.

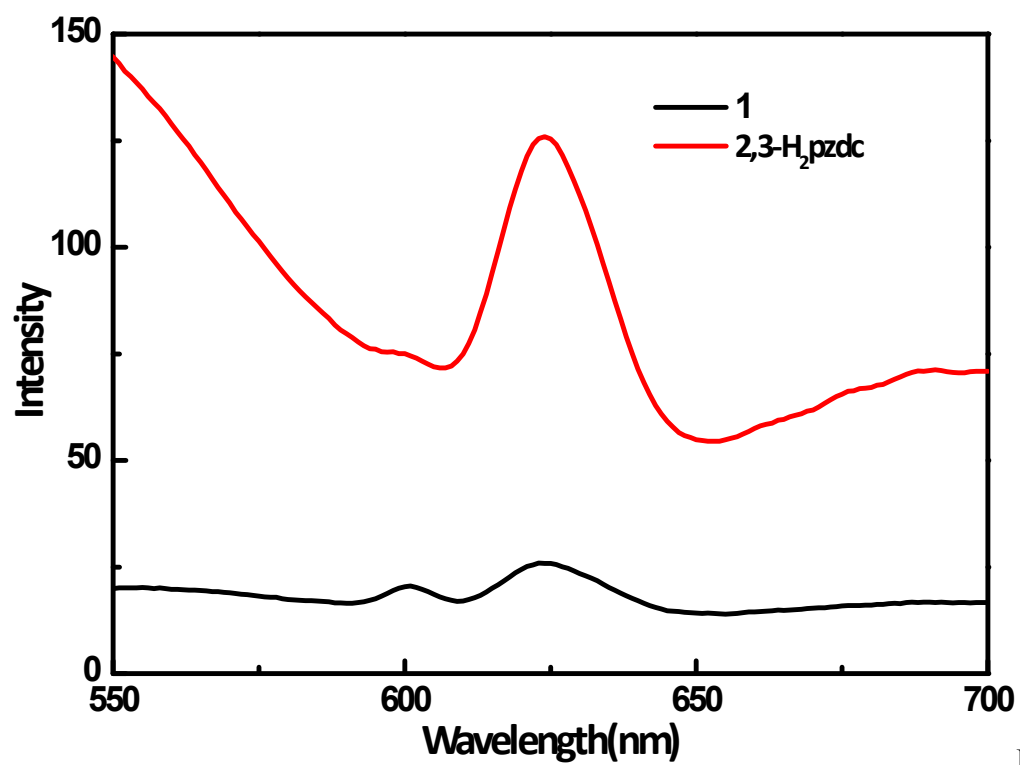

Figur

e S7. Solid-state emission spectra of **1** and H<sub>2</sub>pzdc at room temperature.

## Section 3 Catalytic properties

**Table S1.** Catalytic results for the oxidation of DBT in the presence of different POM catalysts.

| catalyst                                                                                                                                                                                                                                                                                          | solvent                                      | O/S  | Tem. (°C) | Time (h) | Conv. (%) | Ref. |
|---------------------------------------------------------------------------------------------------------------------------------------------------------------------------------------------------------------------------------------------------------------------------------------------------|----------------------------------------------|------|-----------|----------|-----------|------|
| TBA <sub>4</sub> H <sub>2</sub> [BW <sub>11</sub> Mn(H <sub>2</sub> O) <sub>39</sub> ]-H <sub>2</sub> O                                                                                                                                                                                           | CH <sub>3</sub> CN                           | 6    | 22-24     | 1        | 100       | 1    |
| TBA <sub>4</sub> [γ-HPV <sub>2</sub> W <sub>10</sub> O <sub>40</sub> ]                                                                                                                                                                                                                            | CH <sub>3</sub> CN/<br>t-BuOH                | 1    | 60        | 1        | 88        | 2    |
| [(C <sub>18</sub> H <sub>37</sub> ) <sub>2</sub> (CH <sub>3</sub> ) <sub>2</sub> N] <sub>7</sub> PW <sub>11</sub> O <sub>39</sub>                                                                                                                                                                 | C <sub>4</sub> H <sub>8</sub> O <sub>2</sub> | 2.5  | 60        | 0.5      | 99        | 3    |
| H <sub>6</sub> [(C <sub>6</sub> H <sub>4</sub> NO <sub>2</sub> Cu(H <sub>2</sub> O) <sub>4</sub> ) <sub>2</sub> ][Mn <sub>2</sub> V <sub>22</sub> O <sub>64</sub> ]-28H <sub>2</sub> O                                                                                                            | CH <sub>2</sub> Cl <sub>2</sub>              | 3    | 60        | 1.67     | 82        | 4    |
| Fe <sub>3</sub> O <sub>4</sub> -PEI-PW <sub>12</sub> O <sub>40</sub>                                                                                                                                                                                                                              | CH <sub>3</sub> CN                           | 10   | 30        | 10       | 99        | 5    |
| Fe <sub>3</sub> O <sub>4</sub> -SiO <sub>2</sub> -NH <sub>3</sub> -PW <sub>12</sub> O <sub>40</sub>                                                                                                                                                                                               | CH <sub>3</sub> CN                           | 10   | 30        | 10       | 97        | 5    |
| H <sub>3</sub> PW <sub>12</sub> O <sub>40</sub>                                                                                                                                                                                                                                                   | CH <sub>3</sub> CN                           | 10   | 30        | 10       | 99        | 5    |
| Na <sub>10</sub> K <sub>22</sub> [Zr <sub>24</sub> O <sub>22</sub> (OH) <sub>10</sub> (H <sub>2</sub> O) <sub>2</sub> (W <sub>2</sub> O <sub>10</sub> H) <sub>2</sub> -<br>(GeW <sub>9</sub> O <sub>34</sub> ) <sub>4</sub> (GeW <sub>8</sub> O <sub>31</sub> ) <sub>2</sub> ]-85H <sub>2</sub> O | CH <sub>3</sub> CN                           | 3    | 60        | 2        | trace     | 6    |
| [Co(BBPTZ) <sub>3</sub> ][HPMo <sub>12</sub> O <sub>40</sub> ]-24H <sub>2</sub> O                                                                                                                                                                                                                 | CH <sub>2</sub> Cl <sub>2</sub>              | 3.75 | 50        | 8        | 99        | 7    |
| [Co <sup>II</sup> (HBBTZ)(BBTZ) <sub>2.5</sub> ][PMo <sub>12</sub> O <sub>40</sub> ]                                                                                                                                                                                                              | CH <sub>2</sub> Cl <sub>2</sub>              | 3.75 | 50        | 9        | 98        | 7    |
| [Bmim] <sub>3</sub> PMo <sub>12</sub> O <sub>40</sub> /SiO <sub>2</sub>                                                                                                                                                                                                                           | C <sub>7</sub> H <sub>8</sub>                | 3    | 60        | 1        | 88        | 8    |
| [γ-SiW <sub>10</sub> O <sub>34</sub> (H <sub>2</sub> O) <sub>2</sub> ] <sup>4-</sup> @MCM-41-NH <sup>4+</sup>                                                                                                                                                                                     | CH <sub>3</sub> CN                           | 2    | 40        | 24       | 100       | 9    |



**Table S2.** Oxidation of DBT Using Different Catalysts<sup>a</sup>

| Entry | Catalyst                                                                                 | Substrate                                                                          | %Conversion <sup>b</sup> |
|-------|------------------------------------------------------------------------------------------|------------------------------------------------------------------------------------|--------------------------|
| 1     | /                                                                                        |                                                                                    | 34                       |
| 2     | K <sub>14</sub> [As <sub>2</sub> W <sub>19</sub> O <sub>67</sub> (H <sub>2</sub> O)] (2) | 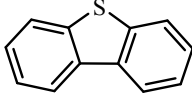 | 20.4                     |
| 3     | 2,3-H <sub>2</sub> pzdc (3)                                                              |                                                                                    | 21                       |
| 4     | CeCl <sub>3</sub> ·7H <sub>2</sub> O (4)                                                 |                                                                                    | 33                       |
| 5     | 1                                                                                        |                                                                                    | 100                      |
| 6     | 2+3+4                                                                                    |                                                                                    | 56                       |

<sup>a</sup> Reaction conditions: the substrate (0.6 mmol), the catalyst corresponding to the substrate/catalyst (S/C) molar ratio of 300; the internal standard (toluene, 0.6 mmol) and H<sub>2</sub>O<sub>2</sub> (1.8 mmol) were stirred in 2.0 mL of CH<sub>3</sub>CN at room temperature for 1h. <sup>b</sup> Conversion values determined by GC-FID.

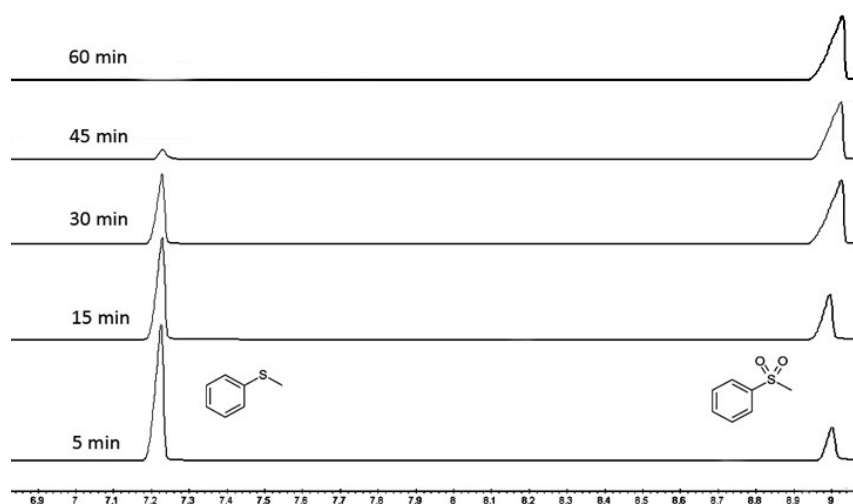**Figure. S8** Typical GC-FID chromatograms illustrating the DBT oxidation reaction profile with H<sub>2</sub>O<sub>2</sub> in the presence of 1 for the S/C molar ratio of 300 at different times.

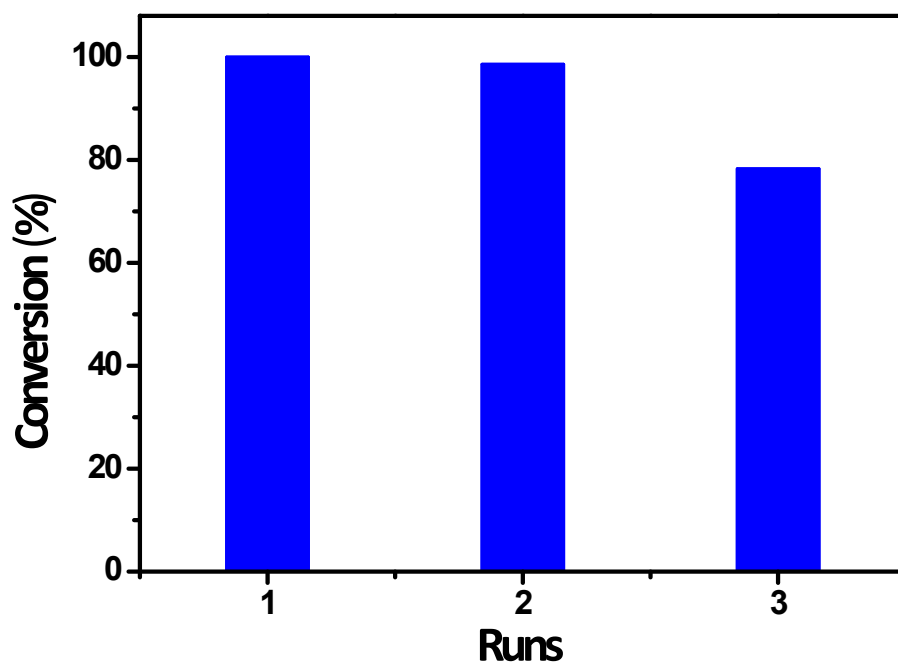

**Figure S9.** Reaction conditions: the substrate (0.6 mmol), the catalyst corresponding to the substrate/catalyst (S/C) molar ratio of 300; the internal standard (toluene, 0.6 mmol) and H<sub>2</sub>O<sub>2</sub> (1.8 mmol) were stirred in 2.0 mL of CH<sub>3</sub>CN at room temperature for 1h.

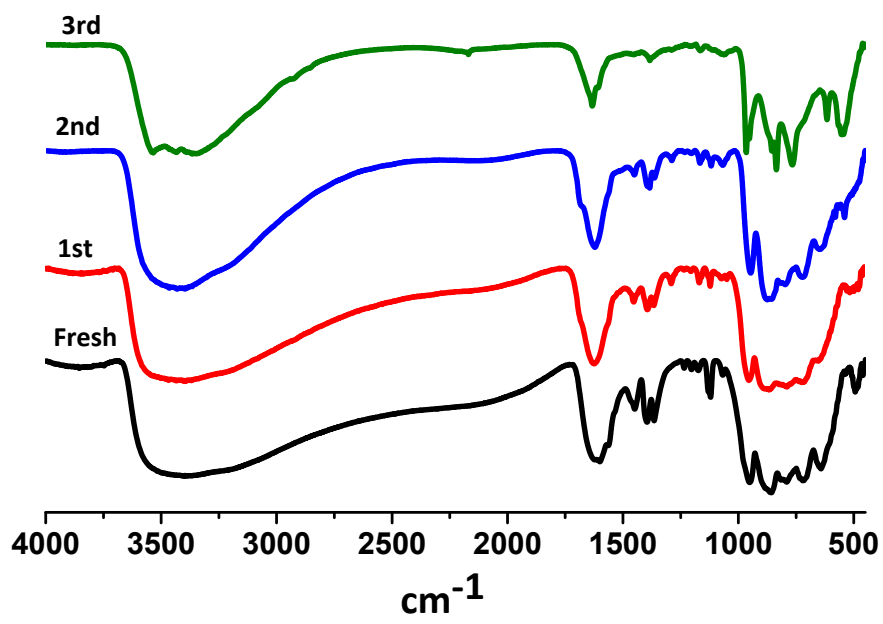

Figure S10. IR spectra of 1 before and after the recycling tests

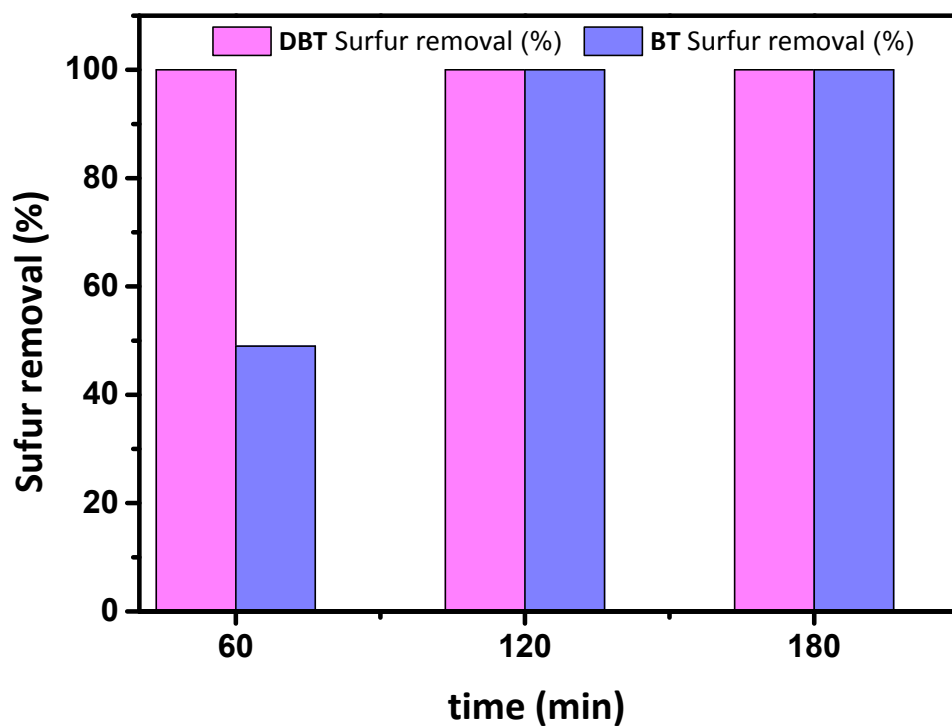

**Figure S11.** Reaction conditions: two substrates (0.06 mmol DBT, 0.06 mmol BT , a total of 0.12 mmol) and the catalyst were dissolved in 500  $\mu\text{L}$  of  $\text{CH}_3\text{CN}$ , and the total reaction volume was completed with 1.5 mL of octane. Addition of  $\text{H}_2\text{O}_2$  and completion of the reaction were done as indicated above.

## Section 4 References

- [1] T. A. G. Duarte, S. M. G. Pires, I. C. M. S. Santos, M. M. Q. Simões, M. G. P. M. S. Neves, A. M. V. Cavaleiro and J. A. S. Cavaleiro, *Catal. Sci. Technol.*, 2016, **6**, 3271–3278.
- [2] T. Yamaura, K. Kamata, K. Yamaguchi and N. Mizuno, *Catal. Today.*, 2013, **203**, 76–80.
- [3] X. Xue, W. Zhao, B. Ma and Y. Ding, *Catal. Commun.*, 2012, **29**, 73–76.
- [4] T. Wang, Y. Lu, D. Liu and E. Wang, *Inorg. Chem. Commun.*, 2016, **69**, 47–51.
- [5] Z. Zhang, F. Zhang, Q. Zhu, W. Zhao, B. Ma and Y. Ding, *J. Colloid Interface Sci.*, 2011, **360**, 189–194.
- [6] L. Huang, S.-S. Wang, J.-W. Zhao, L. Cheng and G.-Y. Yang, *J. Am. Chem. Soc.*, 2014, **136**, 7637–7642.
- [7] X.-L. Hao, Y.-Y. Ma, H.-Y. Zang, Y.-H. Wang, Y.-G. Li and E.-B. Wang, *Chem. - Eur. J.*, 2015, **21**, 3778–3784.
- [8] J. Zhang, A. Wang, X. Li and X. Ma, *J. Catal.*, 2011, **279**, 269–275.
- [9] D. J. Thompson, Y. Zhang and T. Ren, *J. Mol. Catal. Chem.*, 2014, **392**, 188–193.
